# Supplementary material for: Open check dams and large wood: head losses and release conditions
Source: Copernicus journal article supplement (doi:10.5194/nhess-2020-158), 2020-06-02
Supplement: Supplementary file 1 [file nhess-2020-158-supplement.pdf]

# Supplement of Open check dams and large wood: headlosses and release condition

Guillaume PITON, Toshiyuki HORIGUCHI, Lise MARCHAL, Stéphane LAMBERT

## 1 Images of LW mixtures

5 The following pictures illustrate some LW mixture elements.

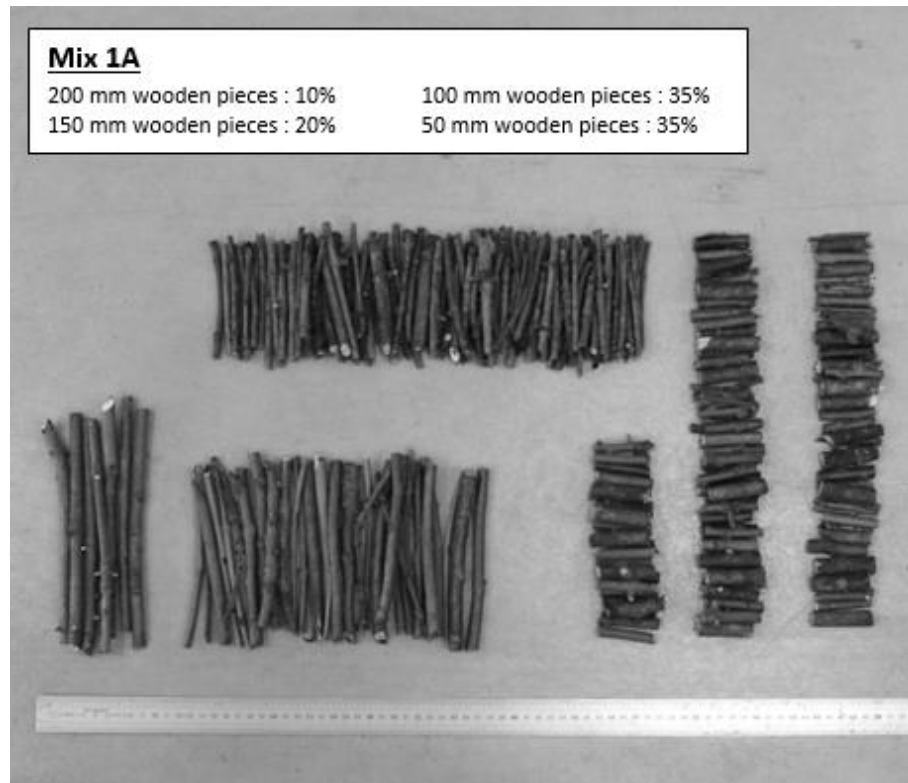

Fig. S 1: Mixture 1A

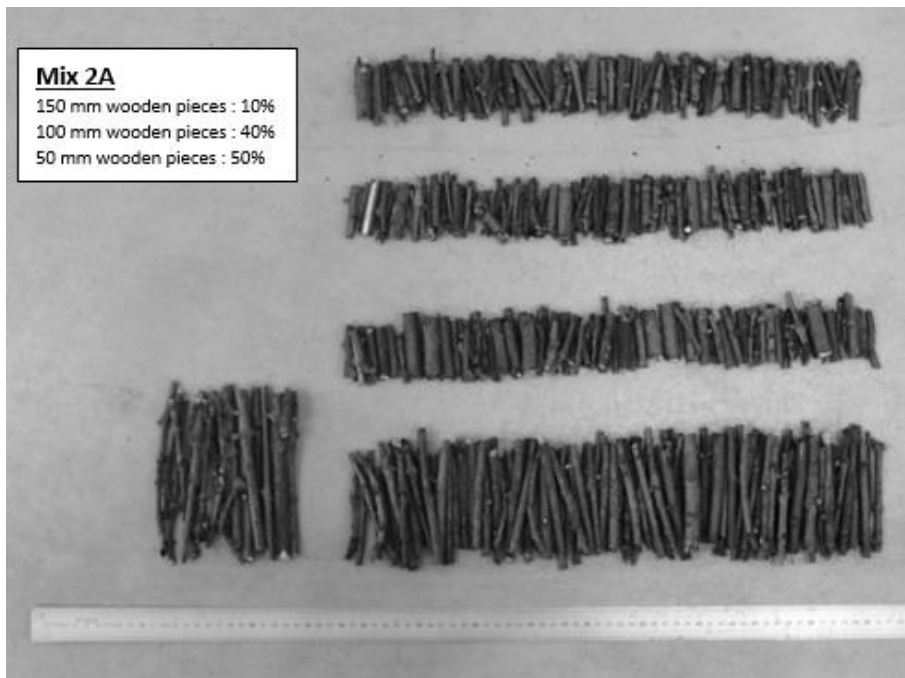

Fig. S 2: Mixture 2A

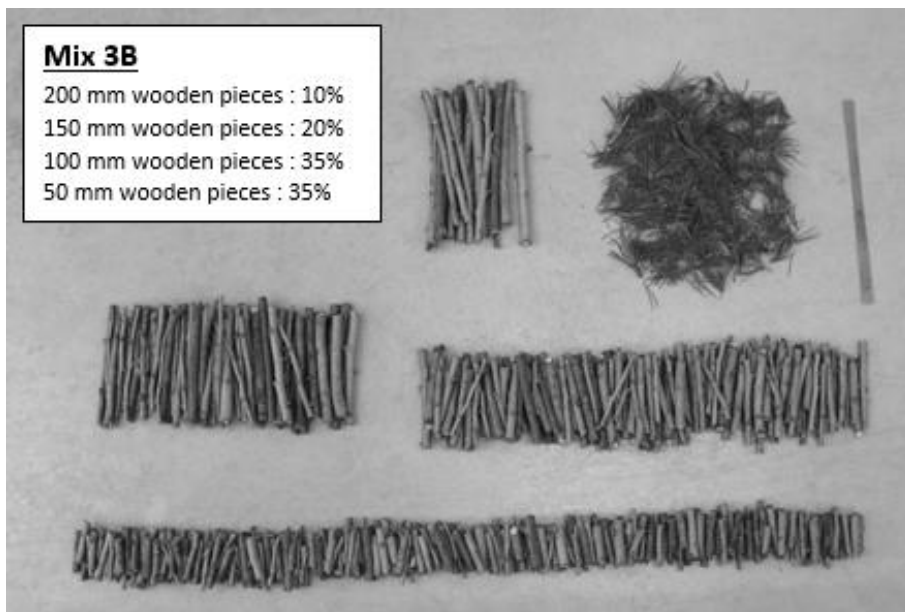

Fig. S 3: Mixture 3B

## 2 Sensitivity analysis on $\beta_1$ coefficients

Two figures are provided for each dam, one where various values of  $\beta_1$  are tested up to flow depths slightly overtopping the dam and one where various values of  $\beta_2$  are tested for flow overtopping the dam, assuming the best adjusted values of  $\beta_1$  (except for the closed dam where no  $\beta_1$  is used).

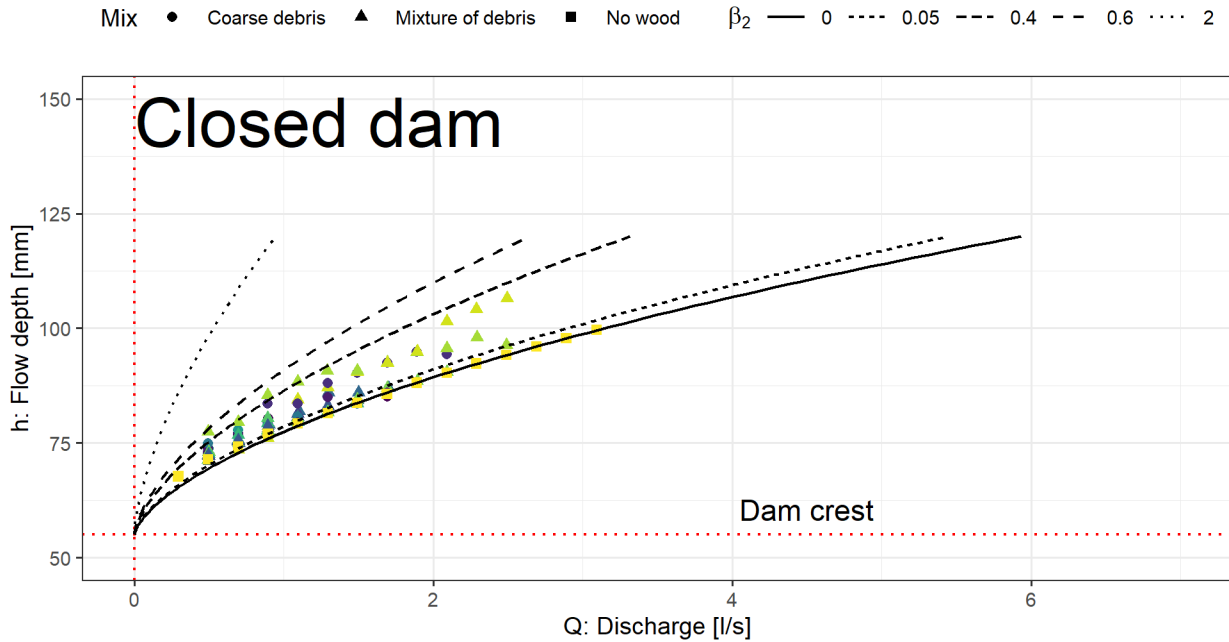

Fig. S 4: Graph flow depth against discharge on Closed dam, measurements and various values of  $\beta_2$

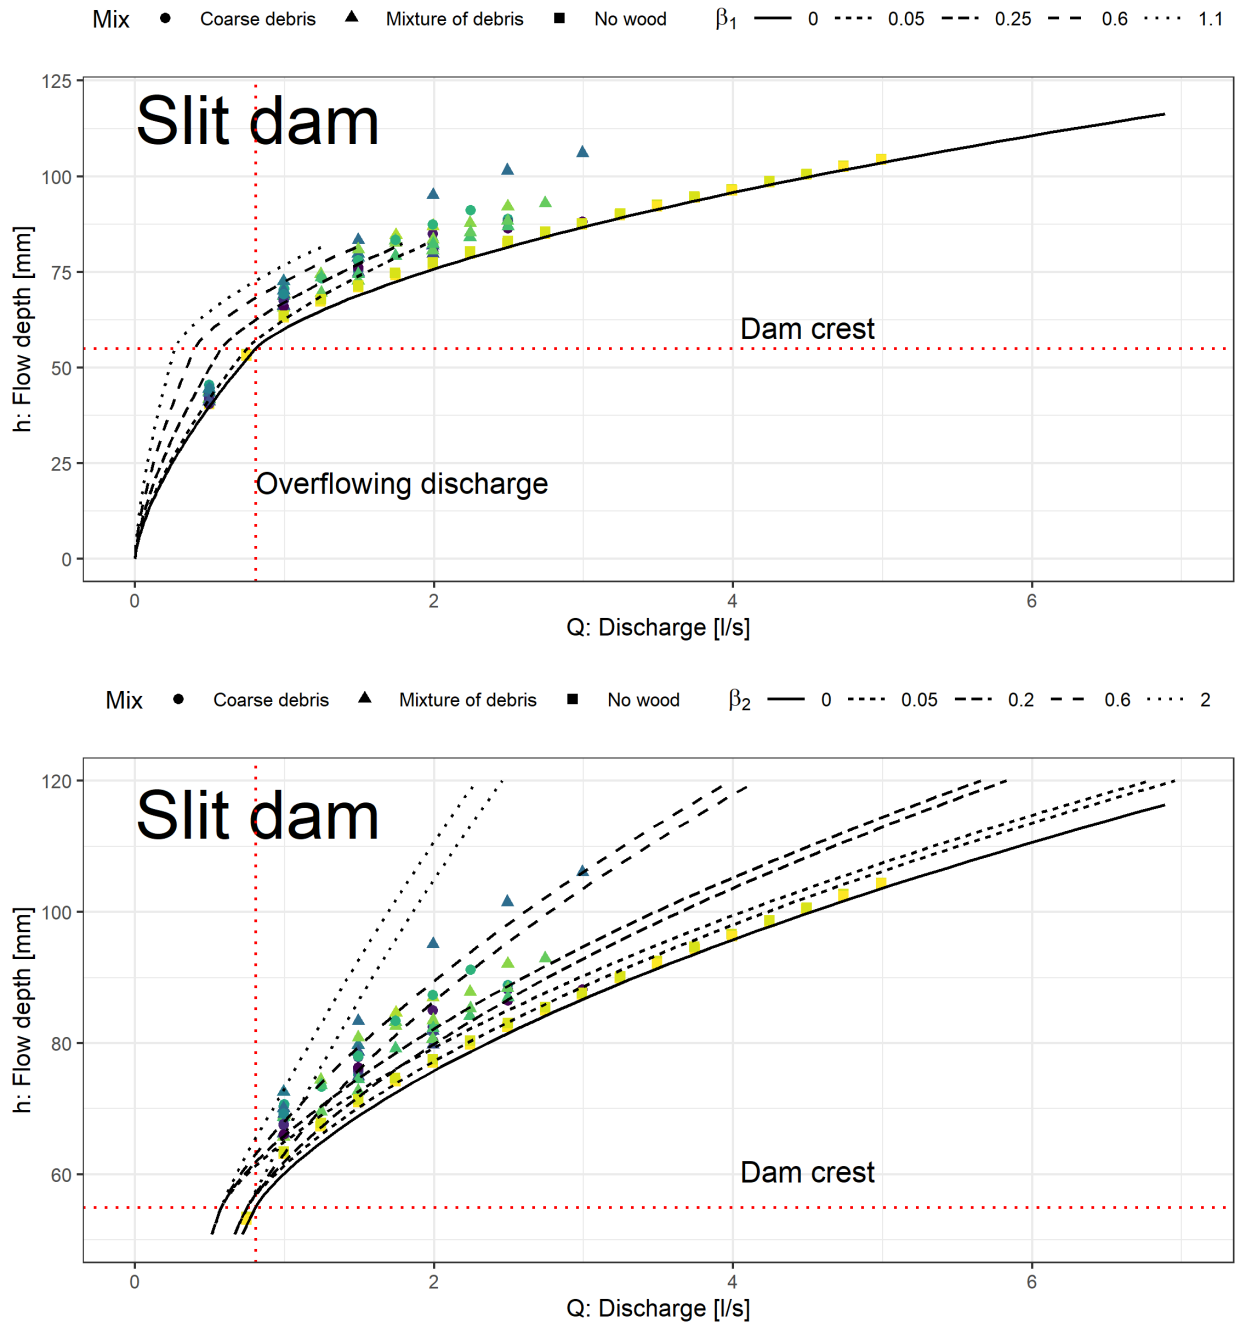

20 Fig. S 5: Graph flow depth against discharge on slit dam, measurements and various values of  $\beta_1$  (upper panel) and  $\beta_2$  (lower panel with zoom on overflowing measurements)

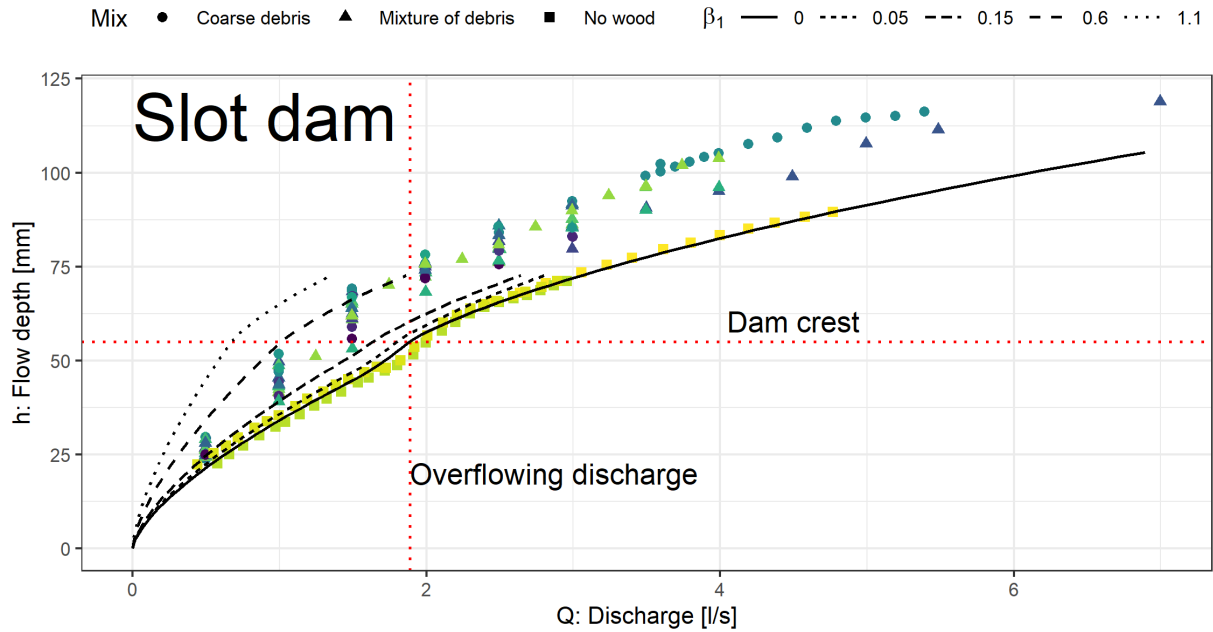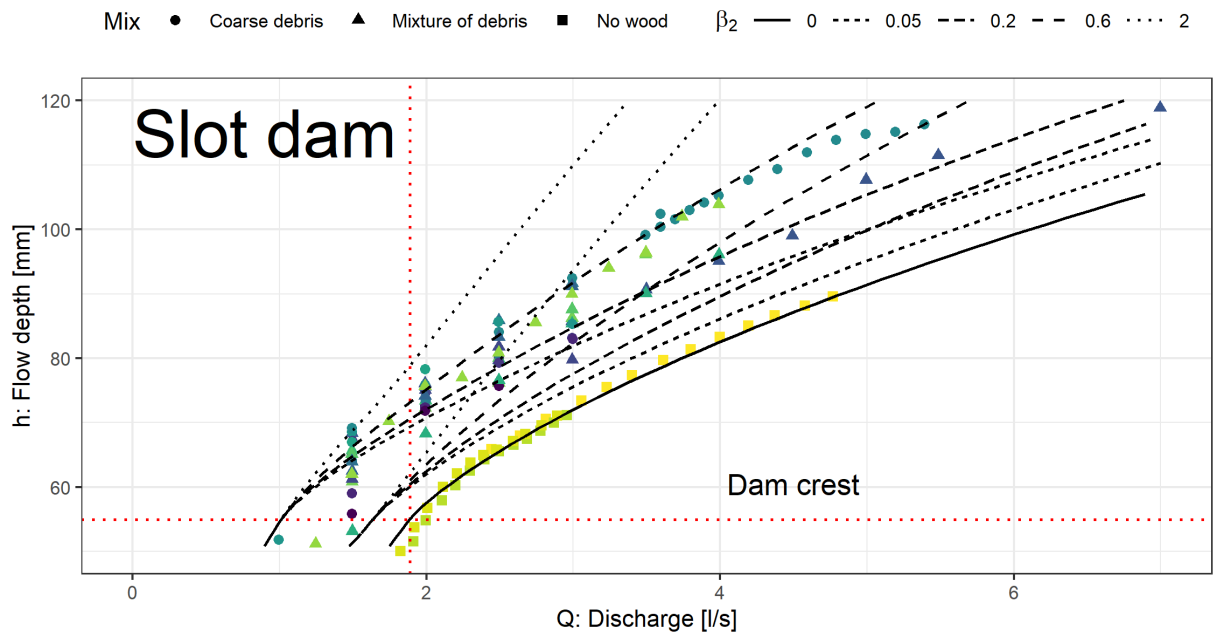

25 Fig. S 6: Graph flow depth against discharge on slot dam, measurements and various values of  $\beta_1$  (upper panel) and  $\beta_2$  (lower panel with zoom on overflowing measurements)

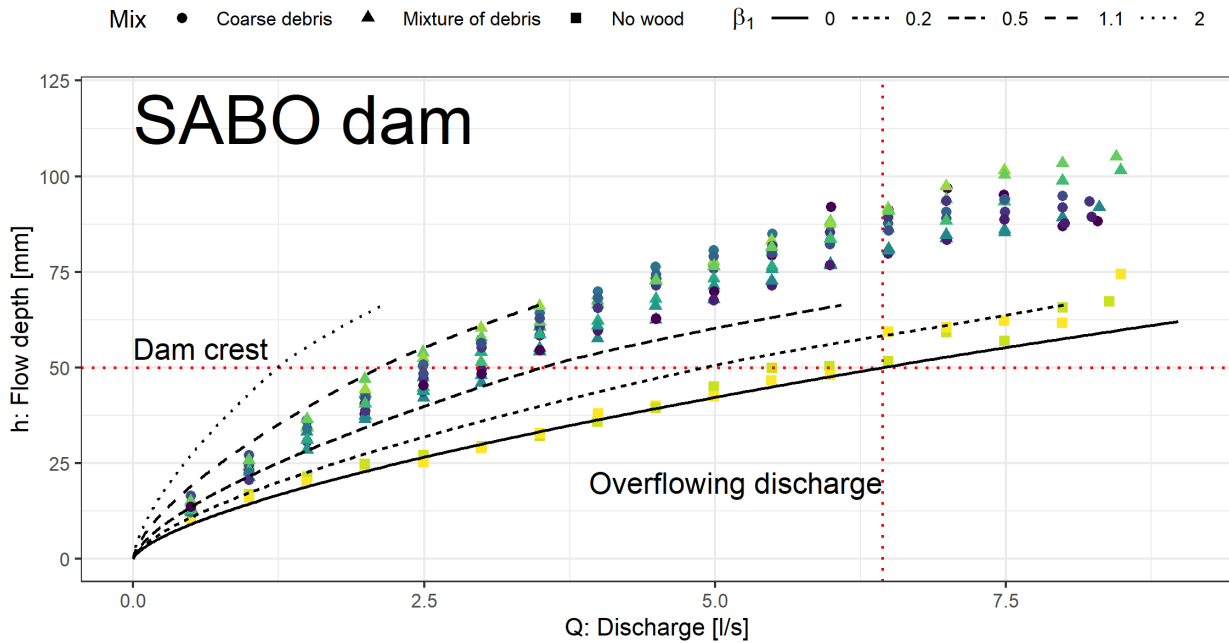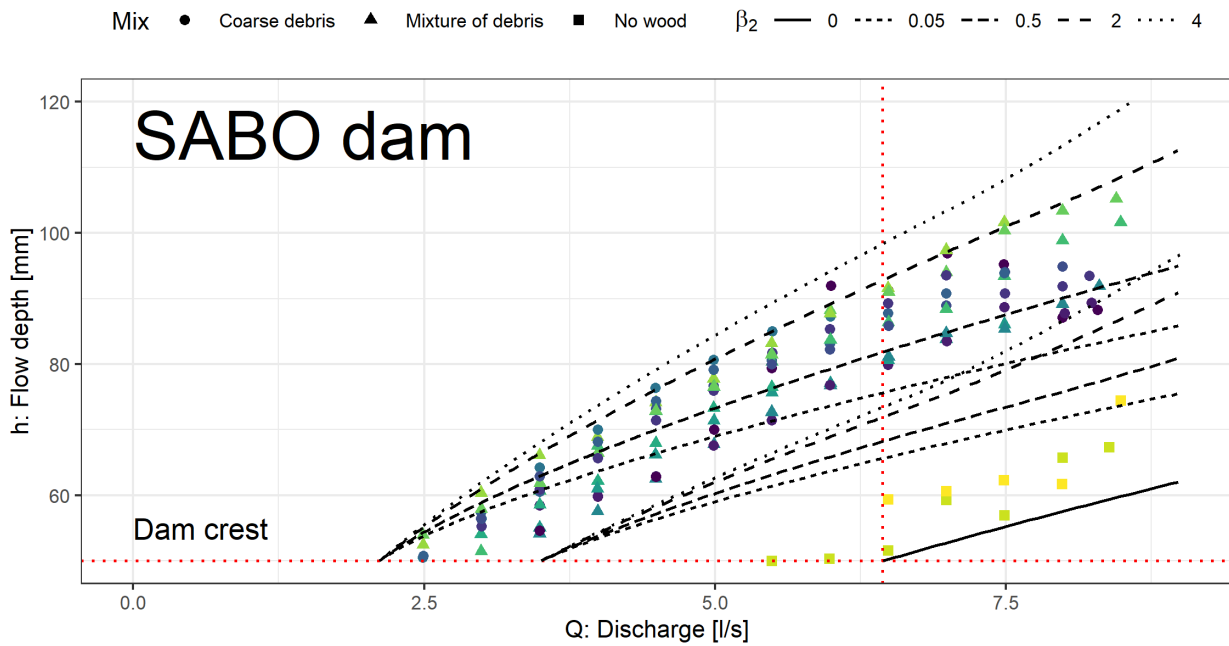

Fig. S 7: Graph flow depth against discharge on SABO dam, measurements and various values of  $\beta_1$  (upper panel) and  $\beta_2$  (lower panel with zoom on overflowing measurements)
